# Supplementary material for: Ultra-high sensitivity of luminescent ZnCr2O4 nanoparticles toward nitroaromatic explosives sensing
Source: Royal Society of Chemistry journal article supplement (doi:10.1039/c8dt00047f), 2018-01-01
Supplement: c8dt00047f1.pdf [file c8dt00047f1.pdf]

**ELECTRONIC SUPPLEMENTARY INFORMATION**

**Ultra high sensitivity of luminescent ZnCr<sub>2</sub>O<sub>4</sub> nanoparticles  
toward aromatic nitro explosives sensing**

**Debamalya Ghosh<sup>1,2</sup>, Uma Dutta<sup>1</sup>, Ariful Haque<sup>1</sup>, Natalia E. Mordvinova<sup>3</sup>, Oleg I. Lebedev<sup>3</sup>, Kamalesh Pal<sup>2</sup>, Arup Gayen<sup>2</sup>, Md. Motin Seikh<sup>1,\*</sup> and Partha Mahata<sup>2,\*</sup>**

*<sup>1</sup>Department of Chemistry, Visva-Bharati University, Santiniketan, West Bengal –731235,  
India*

*<sup>2</sup>Department of Chemistry, Jadavpur University, Kolkata– 700032, India*

*<sup>3</sup>Laboratoire CRISMAT, ENSICAEN UMR6508, 6 Bd Maréchal Juin, Cedex 4, Caen-14050,  
France*

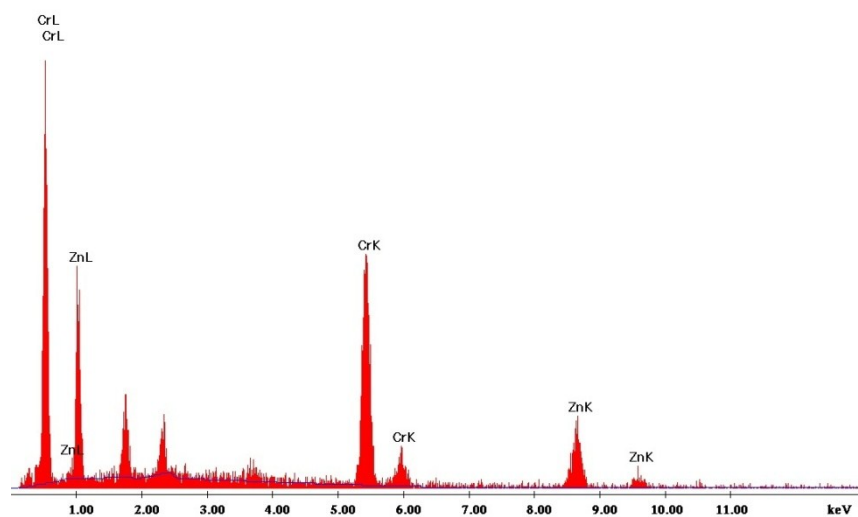

Figure S1: Representative EDX plot of ZnCr<sub>2</sub>O<sub>4</sub>, which confirms the presence of metal cations as per the nominal composition of 1:2 (Zn:Cr).

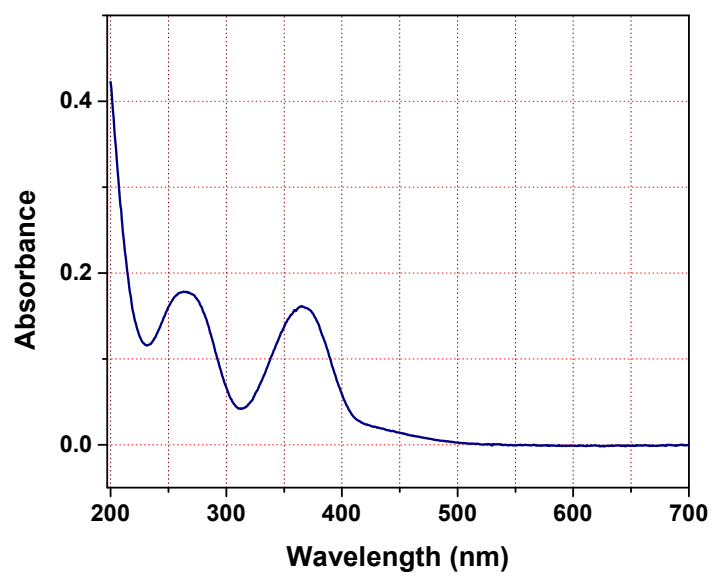

Figure S2: UV absorption spectra of aqueous suspended ZnCr<sub>2</sub>O<sub>4</sub>

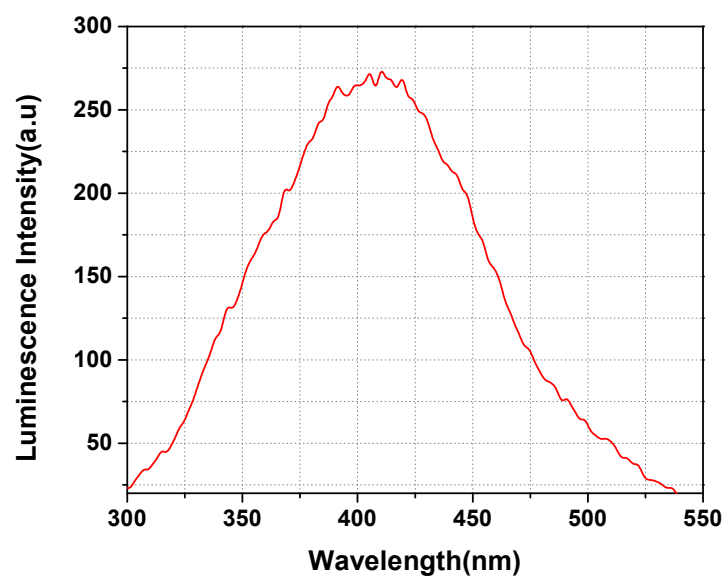

Figure S3: Emission spectrum of ZnCr<sub>2</sub>O<sub>4</sub> suspended in water ( $\lambda_{\text{ex}} = 260$  nm).

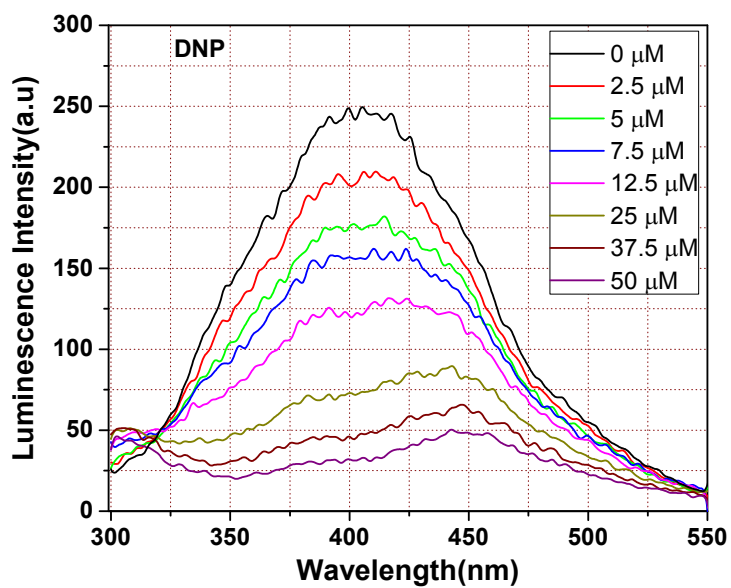

Figure S4: Emission spectra of ZnCr<sub>2</sub>O<sub>4</sub> suspended in water upon incremental addition of DNP solution ( $\lambda_{\text{ex}}=260$  nm). The final concentration of DNP in the medium is indicated in the legend.

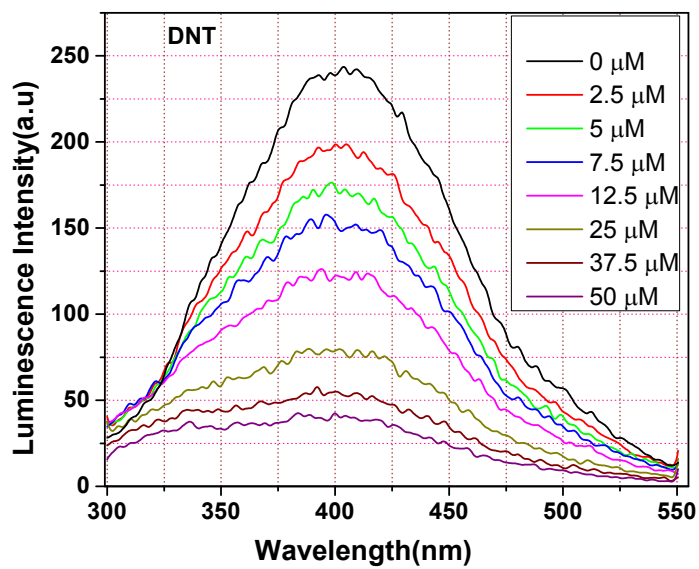

Figure S5: Emission spectra of ZnCr<sub>2</sub>O<sub>4</sub> suspended in water upon incremental addition of DNT solution ( $\lambda_{\text{ex}} = 260$  nm). The final concentration of DNT in the medium is indicated in the legend.

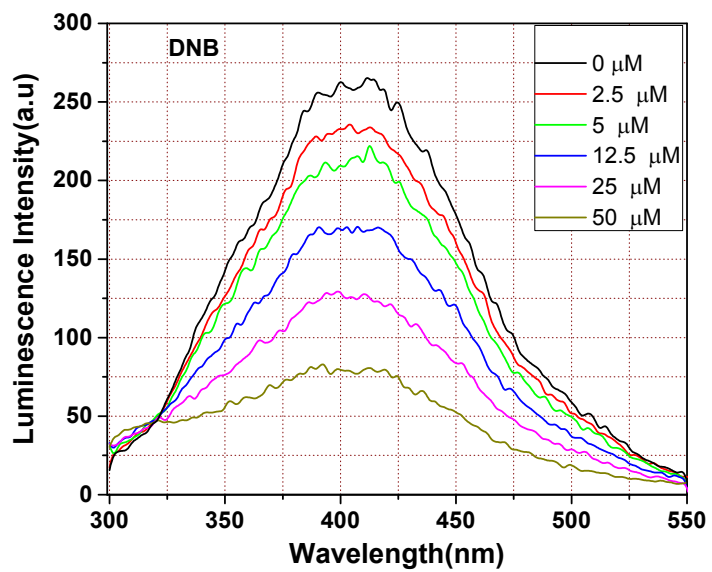

Figure S6: Emission spectra of ZnCr<sub>2</sub>O<sub>4</sub> suspended in water upon incremental addition of DNB solution ( $\lambda_{\text{ex}} = 260$  nm). The final concentration of DNB in the medium is indicated in the legend.

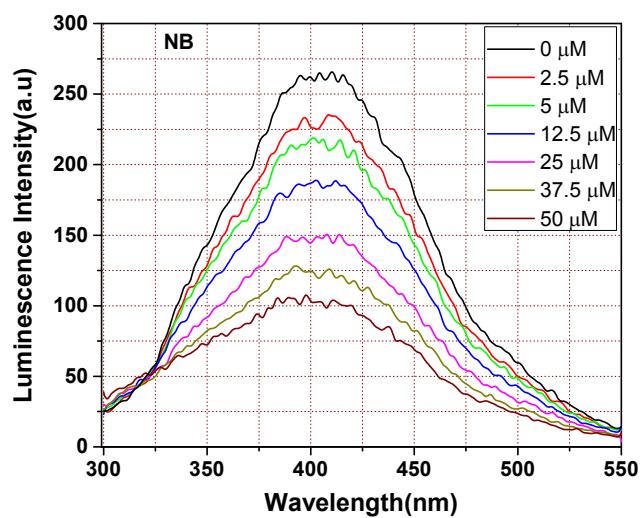

Figure S7: Emission spectra of ZnCr<sub>2</sub>O<sub>4</sub> suspended in water upon incremental addition of NB solution ( $\lambda_{\text{ex}} = 260$  nm). The final concentration of NB in the medium is indicated in the legend.



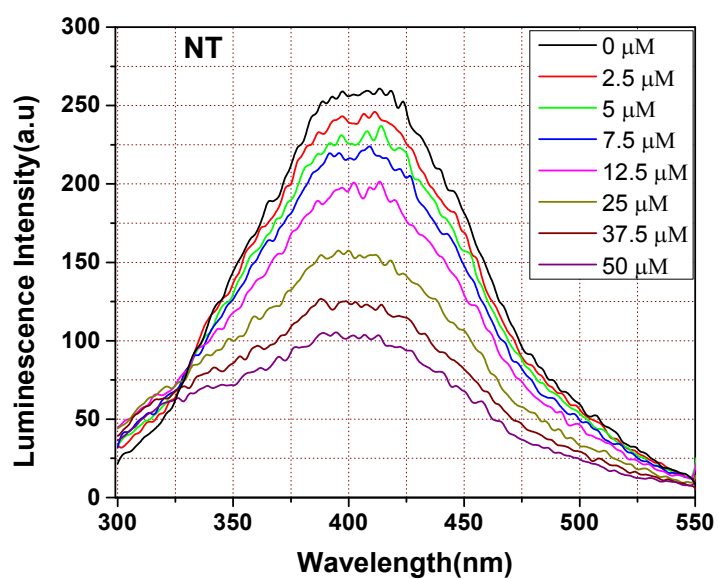

Figure S8: Emission spectra of ZnCr<sub>2</sub>O<sub>4</sub> suspended in water upon incremental addition of NT solution ( $\lambda_{\text{ex}} = 260$  nm). The final concentration of NT in the medium is indicated in the legend.

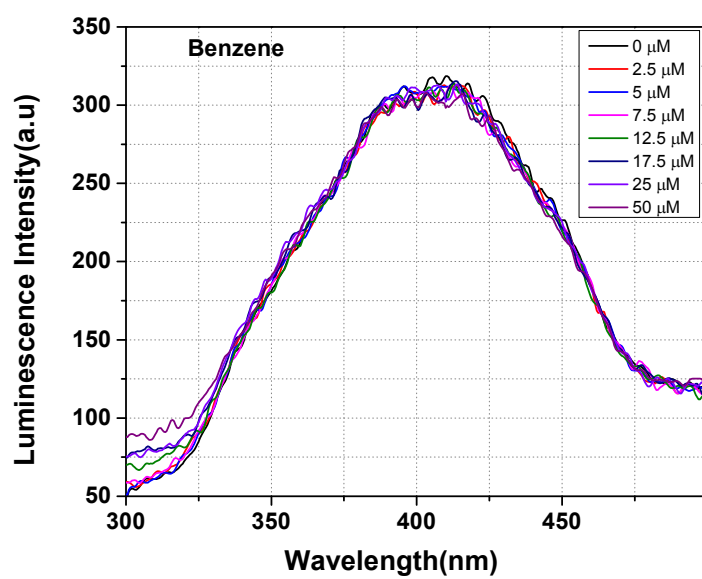

Figure S9: Emission spectra of ZnCr<sub>2</sub>O<sub>4</sub> suspended in water upon incremental addition of Benzene solution ( $\lambda_{\text{ex}} = 260$  nm). The final concentration of Benzene in the medium is indicated in the legend.

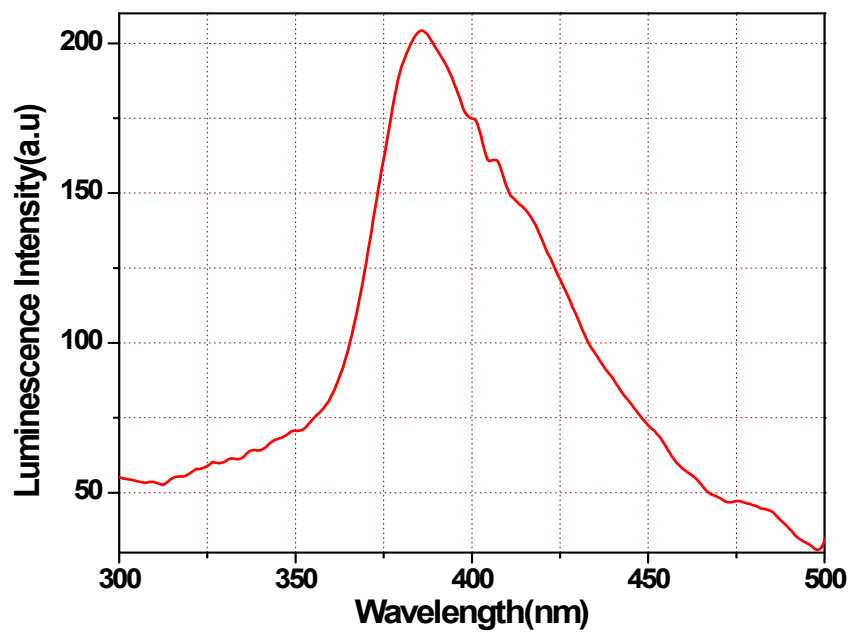

Figure S10: Emission spectrum of ZnO suspended in water ( $\lambda_{\text{ex}} = 260$  nm). This spectrum is collected using PerkinElmer LS-55 spectrofluorometer.

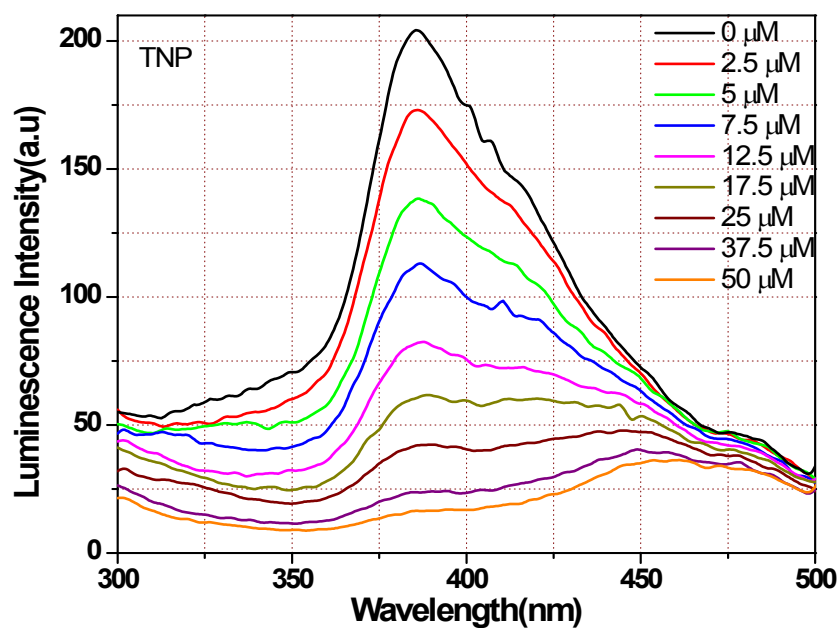

Figure S11: Emission spectra of ZnO suspended in water upon incremental addition of TNP solution ( $\lambda_{\text{ex}}=260$  nm). The final concentration of TNP in the medium is indicated in the legend.

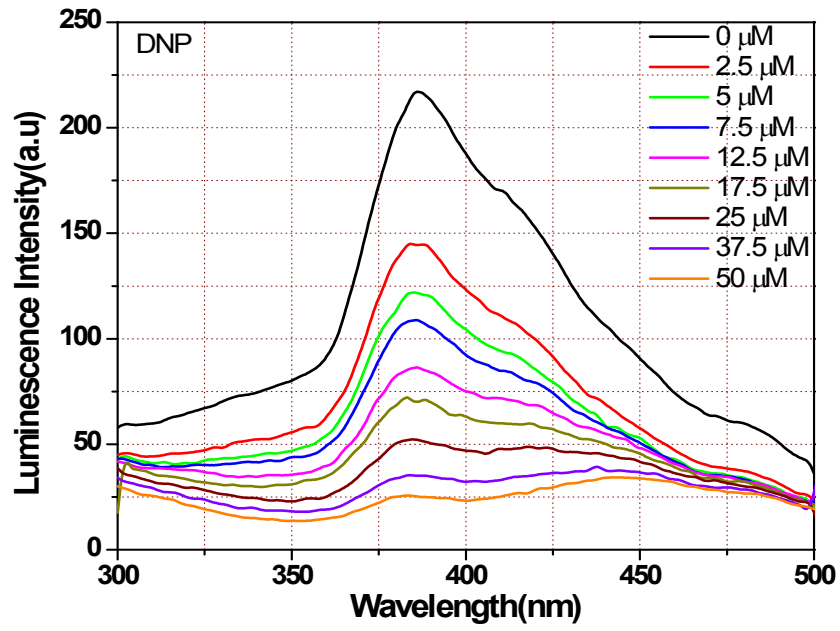

Figure S12: Emission spectra of ZnO suspended in water upon incremental addition of DNP solution ( $\lambda_{\text{ex}}=260$  nm). The final concentration of DNP in the medium is indicated in the legend.

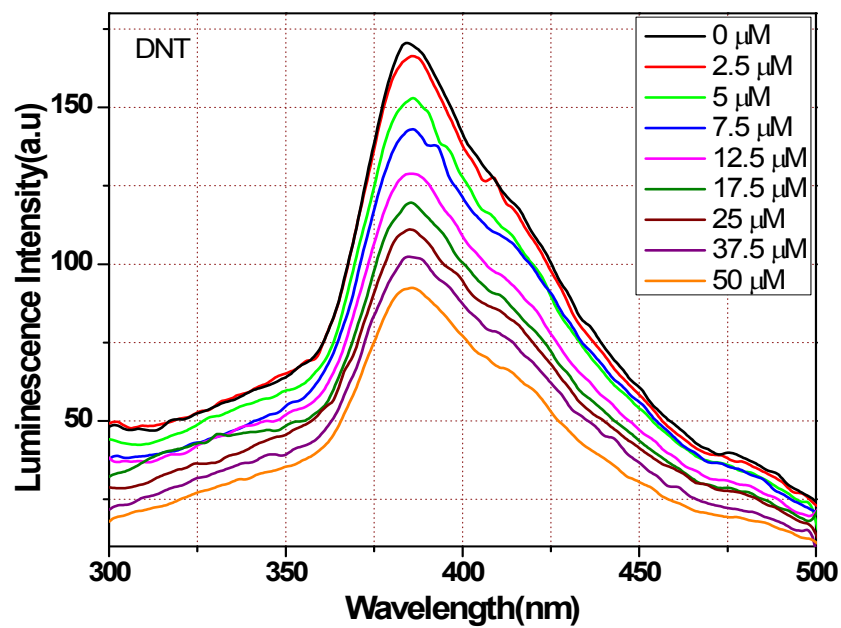

Figure S13: Emission spectra of ZnO suspended in water upon incremental addition of DNT solution ( $\lambda_{\text{ex}} = 260$  nm). The final concentration of DNT in the medium is indicated in the legend.

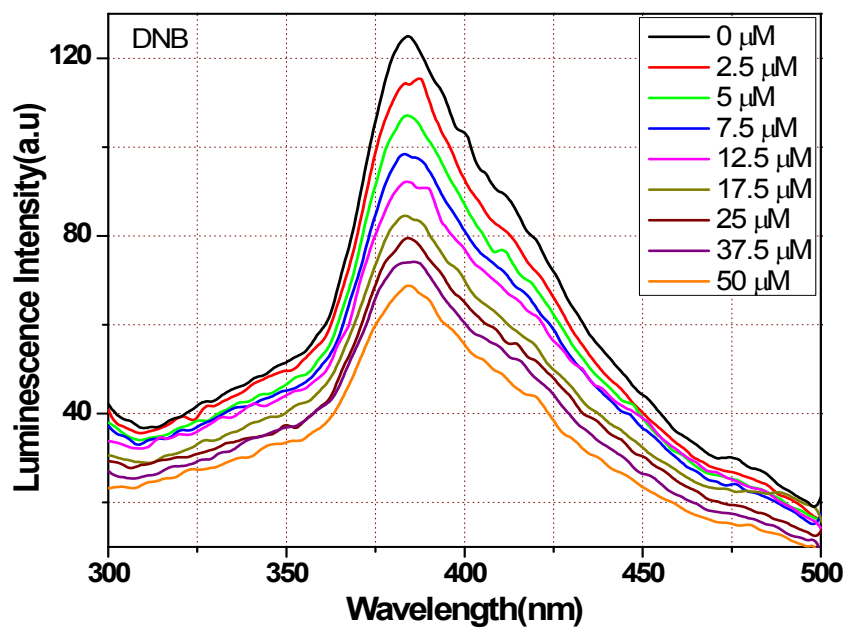

Figure S14: Emission spectra of ZnO suspended in water upon incremental addition of DNB solution ( $\lambda_{\text{ex}}=260$  nm). The final concentration of DNB in the medium is indicated in the legend.

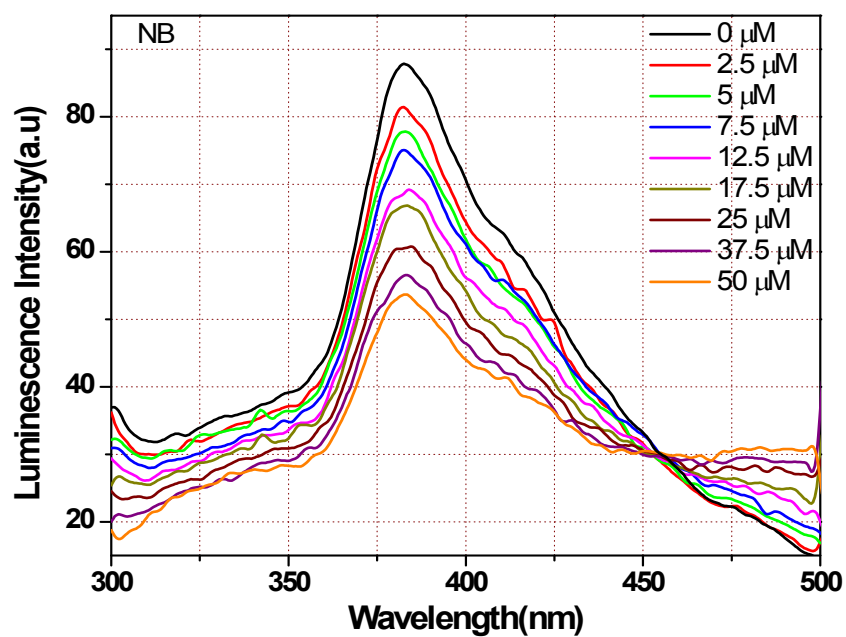

Figure S15: Emission spectra of ZnO suspended in water upon incremental addition of NB solution ( $\lambda_{\text{ex}}=260$  nm). The final concentration of NB in the medium is indicated in the legend.



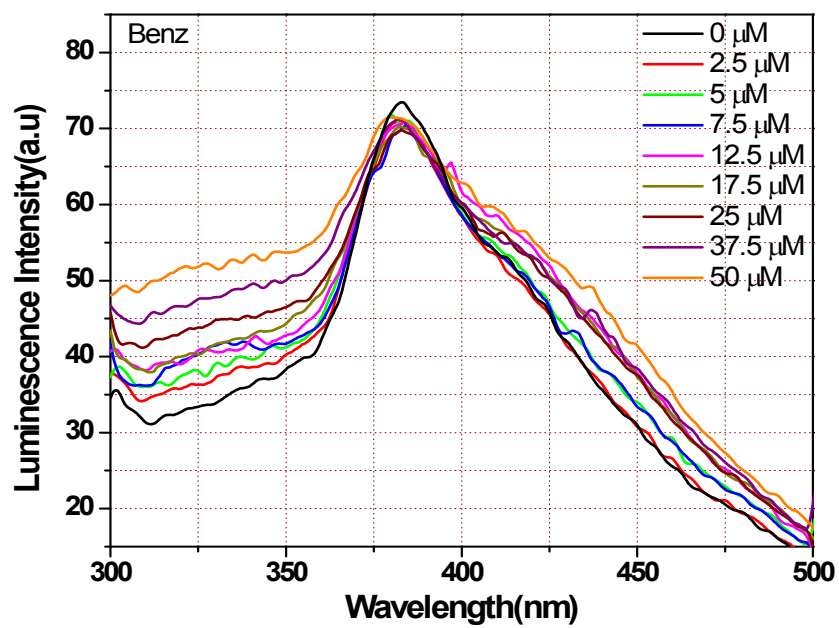

Figure S16: Emission spectra of ZnO suspended in water upon incremental addition of Benzene solution ( $\lambda_{\text{ex}}=260$  nm). The final concentration of Benzene in the medium is indicated in the legend.

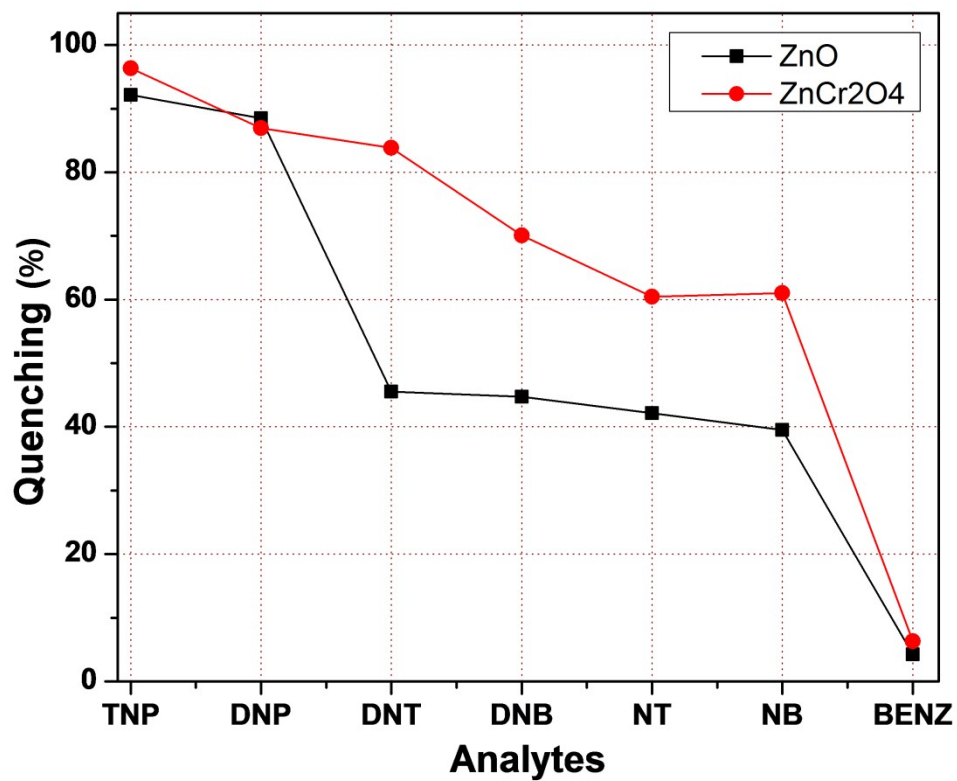

Figure S17: Percentage of quenching in presence analytes with 50  $\mu$ M concentration for ZnCr<sub>2</sub>O<sub>4</sub> and ZnO.

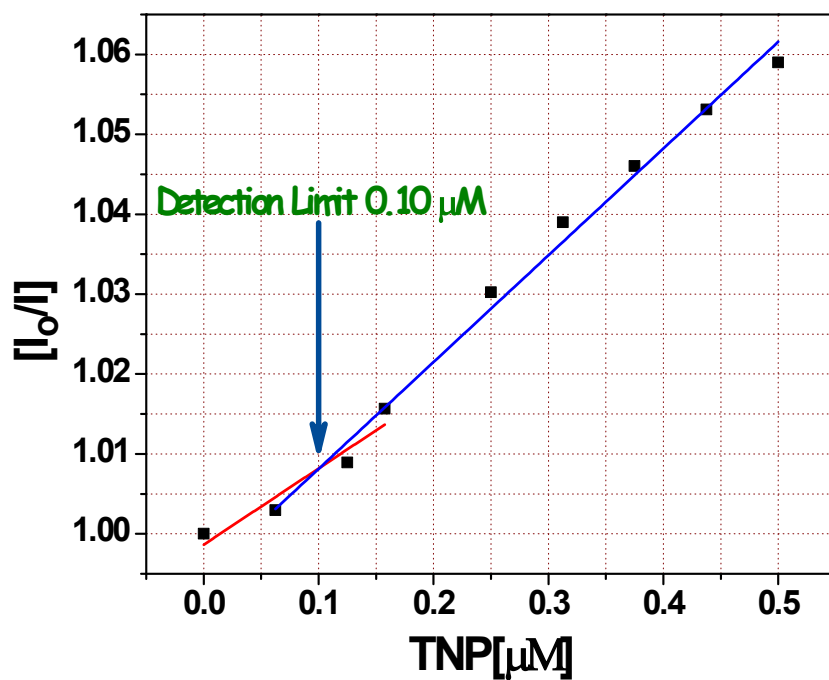

Figure S18: Plot of changes of luminescence intensity of nano-sized  $\text{ZnCr}_2\text{O}_4$  (at 410 nm) vs concentration of TNP indicating the detection limit (where  $I_0$  and  $I$  are luminescence intensity in the absence and in the presence of TNP, respectively).

Table S1: Result of optical gap calculation in gas phase using B3LYP/6-31+G(d) level of theory using Gaussian 16.

| Nitro-aromatics | HOMO (eV) | LUMO (eV) | $\Delta E = (E_{\text{HOMO}} - E_{\text{LUMO}})$ | Peaks in experimental data of absorption spectra |
|-----------------|-----------|-----------|--------------------------------------------------|--------------------------------------------------|
| TNP             | -8.67645  | -4.37509  | -4.30136                                         | 2.92, 3.39 and 5.48                              |
| DNP             | -8.00572  | -3.77103  | -4.23469                                         | 3.1, 3.47, 4.78, 5.46, 5.84                      |
| DNT             | -8.42067  | -3.42220  | -4.99847                                         | 4.94                                             |
| NT              | -7.65498  | -2.79092  | -4.86406                                         | 4.36, 5.71                                       |
| DNB             | -8.73060  | -3.59661  | -5.13399                                         | 5.12                                             |
| NB              | -7.88709  | -2.91310  | -4.97399                                         | 4.64, 5.84                                       |
